1 Plant phenology influences rhizosphere microbial community and is accelerated by serpentine  
2 microorganisms in *Plantago erecta*.

3

4 Authors: Alexandria N. Igwe<sup>1</sup>, Bibi Quasem<sup>2</sup>, Naomi Liu<sup>2</sup>, Rachel L. Vannette<sup>2</sup>

5

6 Address:

7 1. University of Miami, 1301 Memorial Drive, Coral Gables, FL 33146, United States

8 2. University of California - Davis, One Shields Ave, Davis, CA 95616, United States

9

10 Corresponding Author: Alexandria N. Igwe, [aigwe@ucdavis.edu](mailto:aigwe@ucdavis.edu)

11

12 Keywords: serpentine; plant-microbe interaction; rhizosphere; plant development; *Plantago*  
13 *erecta*

14

15

16

17 ABSTRACT

18 Serpentine soils are drought-prone and rich in heavy metals, and plants growing on serpentine  
19 soils host distinct microbial communities that may affect plant survival and phenotype. However,  
20 whether the rhizosphere communities of plants from different soil chemistries are initially  
21 distinct or diverge over time may help us understand drivers of microbial community structure  
22 and function in stressful soils. Here, we test the hypothesis that rhizosphere microbial  
23 communities will converge over time (plant development), independent of soil chemistry and  
24 microbial source. We grew *Plantago erecta* in serpentine or nonserpentine soil, with serpentine  
25 or nonserpentine microbes and tracked plant growth and root phenotypes. We used 16S rRNA  
26 barcoding to compare bacterial species composition at seedling, vegetative, early-, and late-  
27 flowering phases. Plant phenotype and rhizosphere bacterial communities were mainly structured  
28 by soil type, with minor contributions by plant development, microbe source and their  
29 interactions. Serpentine microorganisms promoted early flowering in plants on non-serpentine  
30 soils. Despite strong effects of soil chemistry, the convergence in bacterial community  
31 composition across development demonstrates the importance of the plant-microbe interactions  
32 in shaping microbial assembly processes across soil types.

33

34

35

36 INTRODUCTION

37 Plant-microbe associations occur on a small scale, but can impact global patterns, including plant  
38 and microbial biodiversity (Cui and He 2009; Ravichandran and Thangavelu 2017; Kandlikar et  
39 al. 2019). Plants associate with distinct microbial communities that can benefit plants by  
40 enhancing nutrient acquisition (Emami et al. 2018; Fei et al. 2020) and protection against  
41 pathogens (De Curtis et al. 2010; Akhtar et al. 2011). These associations generate plant-soil  
42 feedbacks which can influence plant community structure (Van Der Heijden et al. 2006). Plant-  
43 microbe associations have also been explored for their ability to impact the phenotypes of  
44 agricultural plants (Gouda et al. 2018). As a result, microbial amendments are being developed  
45 for their ability to influence plant yield (Murgese et al. 2020) and stress tolerance (Orlandini et  
46 al. 2014; Kwak et al. 2018). However, the extent to which soil community members establish in  
47 the rhizosphere, and when during a plant's development, remain poorly understood and may  
48 affect the efficacy of microbial amendments.

49

50 Soil chemistry and plant species both influence the composition of rhizosphere microbial  
51 communities (Haichar et al. 2008; Berg and Smalla 2009). Plant development, or phenology, has  
52 been shown to correlate with distinct microbial associations. For example, seedlings of  
53 *Arabidopsis thaliana* showed distinct microbial communities from later-phase plants (Chaparro  
54 et al. 2014). In *Oryza sativa*, rhizosphere microbial communities are dynamic during vegetative  
55 growth and can represent particular life phases (Edwards et al. 2018). One mechanism for plant  
56 effects on rhizosphere communities is through the rhizodeposition of root exudates, which can  
57 change over time and correlates with distinct rhizosphere microbial communities observed at  
58 each phase of plant development (Chaparro et al. 2013; Zhalnina et al. 2018). However, whether  
59 the same plant species assemble microbial communities similarly in distinct soil backgrounds  
60 remains unexplored.

61

62 Serpentine soils are characterized by low water-holding-capacity, elevated concentrations of  
63 heavy metals, low concentrations of essential plant nutrients, and high Mg to Ca ratios (O'Dell et  
64 al. 2006). These characteristics are partially responsible for the low plant productivity and  
65 endemism observed on serpentine soils (Anacker 2014). While most plants cannot grow on  
66 serpentine soils and other plants can only grow on serpentine soil, serpentine-indifferent plants

67 are able to thrive on serpentine soils and compete on non-serpentine soils (Safford et al. 2005).  
68 Serpentine-indifferent plants, with their ability to grow both on and off serpentine soils, are an  
69 excellent tool with which to study how soil chemistry influences microbial composition and  
70 phenology (Igwe and Vannette 2019). In addition, by utilizing soil treatments with non-adapted  
71 microorganisms we can understand how phenology is influenced by different microbial  
72 communities.

73

74 Abiotic and biotic factors including soil chemistry and soil moisture have also been shown to  
75 influence plant phenology; for example, plants growing on serpentine and drought-prone soils  
76 have generally been shown to flower sooner than those growing on non-serpentine and non-  
77 droughted soils (Sherrard and Maherali 2006; Wright et al. 2006; Rossington et al. 2018;  
78 Sakaguchi et al. 2019), but this is not always the case (Schneider 2017). Therefore, an additional  
79 goal of our experiments was to investigate the abiotic vs biotic control on phenology, especially  
80 as it relates to flowering time.

81

82 In this study, we aimed to answer the following broad ecological question: Do plant rhizosphere  
83 microbial community grown in disparate soil chemistries converge or diverge over time? More  
84 specifically, we test the hypothesis is that soil chemistry influences how microbial communities  
85 change over plant development. Further, we predict that rhizosphere microbial communities  
86 associated with serpentine-indifferent plants growing on serpentine and non-serpentine soils will  
87 become more similar as the plant develops. We also hypothesize that serpentine components  
88 introduced to nonserpentine soils, including serpentine microbes, nickel or simulated drought,  
89 will change microbial communities and plant characteristics to be similar to those of live  
90 serpentine soils. For example, if soil chemistry is the major driver of flowering time, then we can  
91 expect that treatments with the same soil origin, regardless of microbial community, will not  
92 significantly differ in phenology. If the microbial community influences plant phenology to a  
93 greater extent than soil chemistry, we can expect to see significant differences in plant  
94 development in soil treatments with non-adapted microorganisms relative to soil treatments with  
95 adapted microbes. It is important to understand the relative influence of these factors on plant  
96 phenology because the reproductive success of an individual plant and the plant community

97 structure is directly related to plant phenology (Fenner 1998; Rodríguez-Pérez and Traveset  
98 2016; Hidalgo-Triana and Pérez-Latorre 2018).

99

## 100 METHODS

### 101 *Study system and soil collection*

102 Soils were collected from McLaughlin Natural Reserve in June 2018 from three serpentine and  
103 three nonserpentine sites (Sites 1, 2, and 3 from Igwe and Vannette 2019). McLaughlin Natural  
104 Reserve is characterized by a Mediterranean climate with hot and dry summers from April to  
105 October. Gallon-sized plastic bags of soil were collected every 5-meters across a 20-meter  
106 transect at each site at an average depth of 10 cm. These soils were placed on ice in the field and  
107 then in Sterilite plastic containers at 4°C until the start of the experiment in July 2018. We used  
108 *Plantago erecta* (Serpentine Affinity Mean = 1.0), which is common in serpentine and non-  
109 serpentine sites locally (Safford et al. 2005). Seeds used in the experiment were purchased from  
110 S&S Seeds in 2016 (Carpinteria, CA) after field-collected seeds germinated poorly.

111

### 112 *Growth chamber experiment*

113 We conducted an experiments aimed to examine how background soil chemistry and soil  
114 microbial community jointly influence plant growth and microbial community assembly in the  
115 rhizosphere. All soils included an autoclaved soil background (serpentine or nonserpentine), to  
116 which live (unautoclaved) soils from either serpentine or nonserpentine soils were added at  
117 approximately 16% (v/w) to create the microbial amendments (Farrer and Suding 2016;  
118 Calderón et al. 2017). Soils were autoclaved at 120°C at 15 psi for two 30-min periods with 24-  
119 hours between sterilizations (Ishaq et al. 2017). Using this method, four factorial treatments were  
120 created: autoclaved serpentine soil with serpentine microbes (S+Sm), autoclaved nonserpentine  
121 soil with nonserpentine microbes (NS+NSm), autoclaved serpentine soil with nonserpentine  
122 microbes (S+NSm), autoclaved nonserpentine soil with serpentine microbes (NS+Sm). In  
123 addition, to explore which dimensions of serpentine soils shape plant-microbe-soil interactions  
124 (Wright et al. 2006), we amended some NS+Sm treatments with either nickel (final  
125 concentration of 25 ppm; NS+Sm+Ni), or grew plants in conditions simulating drought stress  
126 (NS+Sm+Drought).

127

128 *Plantago erecta* seeds were added to D16 Deepspots (volume: 16 in<sup>3</sup> and 262 mL; Stuewe and  
129 Sons., Inc, Tangent, OR) containing ~100 g of soil in one of six soil chemistries above. Plants  
130 were grown in a growth chamber under 12:12 light/dark regime at 20°C at the UC Davis  
131 Environmental Horticulture Greenhouse Complex and were grown to senescence, with 15  
132 replicates per treatment and 3 non-planted controls per treatment. The simulated drought soil  
133 treatment was watered until the soil was saturated once a week while all other soil treatments  
134 were watered daily with DI water. Leaf number and plant height were recorded weekly until  
135 senescence. Plants in each treatment were harvested at seedling, vegetative, early flowering, and  
136 late flowering phases and a random subset (N=6) were used for rhizosphere soil collection,  
137 microbial DNA extraction, and 16S rRNA sequencing. Plants were classified as ‘seedlings’ upon  
138 emergence from the soil. When true leaves were present, plants were classified as ‘vegetative’.  
139 ‘Early flowering’ was characterized by shoot development and the presence of an undeveloped  
140 terminal protuberance. Once the plant began to bloom, the plant was characterized as ‘late  
141 flowering’. Once the plant became brittle to the touch, they were classified as ‘senescing’. For  
142 two treatments (NS+Sm+Ni) and (NS+Sm+Drought), only seedling and late flowering phases  
143 were harvested due to limitation in growth chamber space.

144

#### 145 *Rhizosphere soil collection*

146 For each harvested plant, roots were shaken to remove loosely adhering soil. An ethanol-  
147 sterilized razor was used to separate the stem from the roots. Above-ground plants were dried at  
148 80°C for 48 hours and then weighed.

149 Roots were separated from rhizosphere soils. Briefly, roots were sonicated in 0.9% NaCl/0.01%  
150 Tween 80 (v/v) solution for 180 seconds to remove the tightly adhering soil particles (Barillot et  
151 al. 2013). Centrifuge tubes containing NaCl/Tween (without roots) were then centrifuged for 20  
152 minutes at 4°C at 3234 x g. The pellet was frozen at -20°C until DNA extraction using a Zymo  
153 fecal/soil DNA extraction kit according to enclosed directions (Zymo Research, Irvine, CA).

154 After sonication, root samples were stored in 50% ethanol solution until root image analysis.  
155 DNA extraction was confirmed using a Nanodrop 1000 spectrophotometer (ThermoScientific,  
156 Waltham, MA, USA) then samples were submitted to the Centre for Comparative Genomics and  
157 Evolutionary Bioinformatics Integrated Microbiome Resource at Dalhousie University for PCR  
158 and sequencing. The V6-V8 subregion of the 16S SSU rRNA was amplified using B969F

159 (ACGCGHNRAACCTTACC) and BA1406R (ACGGGCRGTGWGTRCAA) primers (Comeau  
160 et al. 2011). DNA was amplified using Phusion High-Fidelity DNA polymerase (NEB) and  
161 MiSeq (300+300 bp PE) for final amplicon lengths that were 508 bp. Raw sequences are  
162 archived at [www.ncbi.nlm.nih.gov/sra/PRJNA623253](http://www.ncbi.nlm.nih.gov/sra/PRJNA623253).

163

#### 164 *Root imaging*

165 To analyze root length, volume, surface area and diameter, samples were scanned using  
166 WinRHIZO optical scanner and software (Regent Instruments Inc., Canada). Each root sample  
167 was imaged individually by laying them flat onto a tray containing 50% ethanol to cover the  
168 entire root. Tangled roots were carefully separated with forceps and any roots broken off were  
169 also imaged. Before root parameters were measured, any residual soil particles and foreign root  
170 fragments scanned by the imaging software were eliminated from the selected root image. To do  
171 this, the entire root was selected by drawing a box around the imaged root. Next, foreign  
172 particles were excluded from analysis by selecting *Regions - Exclusion Regions* and drawing a  
173 box around each individual target region. Once this step was completed, root parameters  
174 including root length, root diameter, root surface area, and root volume were measured by  
175 selecting *Image - Image with Analysis*.

176

#### 177 *Bioinformatics*

178 Amplicon sequence variants (ASVs) from 16S rRNA amplicons were identified using DADA2  
179 (v1.7.2) (Callahan et al. 2016a). Briefly, paired-end fastq files were processed by filtering and  
180 truncating forward reads at position 250 and reverse reads at position 200. Sequences were  
181 dereplicated, merged and error-corrected according to code archived on Dryad. Chimeras were  
182 removed, and the taxonomy assigned using the SILVA database (v128) (Quast et al. 2012;  
183 Yilmaz et al. 2014; Glöckner et al. 2017). A phylogenetic tree based on 16S sequences was  
184 created using the DECIPHER package (v2.8.1) in R to perform multi-step alignment and  
185 phangorn (v2.4.0) to construct the tree using neighbor-joining (Wright et al. 2006; Schliep 2011).  
186 The sequence table, taxonomy, and metadata were combined into a phyloseq object and used for  
187 further analysis (phyloseq v1.30.0) (McMurdie and Holmes 2013; Callahan et al. 2016b).  
188 Mitochondrial and chloroplast sequences as well as any sequences that were not assigned to  
189 bacteria were removed from the ASV table.

190

191 *Statistical analysis*

192 To visualize the relative abundance of each phylum, ASVs were aggregated to the phylum level  
193 and taxa representing less than 2% of relative abundance were filtered out. To determine effect  
194 of soil treatment and plant developmental phase on alpha diversity of rhizosphere communities,  
195 Shannon diversity was calculated on the full dataset using the `estimate_richness` function in the  
196 `phyloseq` package (1.30.0) and used as a response variable in ANOVA with plant developmental  
197 phase, soil chemistry (S, NS, NS+Sm+Ni, and NS+Sm+D), and microbe source (S or NS) as  
198 predictors. Shannon index was used because it accounts for both abundance and evenness in  
199 samples (Kaisermann et al. 2017).

200 To examine differences in rhizosphere bacterial species composition due to soil chemistry,  
201 microbe source, and plant developmental phases, Bray-Curtis dissimilarities were calculated and  
202 visualized using non-metric multidimensional analysis (NMDS). To determine which predictors  
203 were associated with variation in rhizosphere bacterial composition, we used the ‘`adonis`’  
204 function from the `vegan` package with Bray-Curtis dissimilarities as the response variable and  
205 plant developmental phase, soil chemistry, and microbe source as predictors. To test for  
206 differences in multivariate dispersion among rhizosphere communities, the ‘`betadisper`’ function  
207 from the `vegan` (v2.5.3) package was used (Oksanen et al. 2019) with soil chemistry, plant  
208 developmental phase, and microbe source as predictors.

209 To determine the effects of soil treatments on plant growth, each plant trait (leaf number, plant  
210 height, root length, root diameter, root surface area, and root volume), was analyzed using a  
211 general linearized model with soil chemistry, microbe source, and plant developmental phase as  
212 the predictor and differences between group means were identified using likelihood ratio tests.

213 Tukey HSD was used as a post-hoc test to identify differences among groups.

214 To determine the effects of soil treatments on time to flowering, survival analysis was conducted  
215 on binary flowering data (yes/no) using Kaplan-Meier curves and a Cox proportional hazards  
216 regression model (‘`coxph`’) on a survival object (‘`Surv`’) in the `survival` package (v2.42.6) to  
217 describe the soil treatment impacts the probability of flowering over time (Therneau 2015). The  
218 time to event (late flowering), was measured in days from the onset of seedling phase. The model  
219 provides a hazard ratio (HR) where a  $HR > 1$  indicates an increased likelihood of development,  
220 while an  $HR < 1$  indicates a decreased likelihood of development. Differences in the hazard ratio



221 were visualized using ‘ggforest’ in the survminer package (v0.4.3) (Kassambara and Kosinski  
222 2018).

223 To determine if the relative abundance of bacteria ASVs differed among plant developmental  
224 phases or soil chemistries, differential abundance analysis using DESeq2 (1.26.0) was used with  
225 soil chemistry as the predictor. DESeq2 analysis was conducted with all soil treatments for the  
226 seedling and late flowering plant developmental phase and another analysis was conducted with  
227 S+Sm, NS+NSm, S+NSm, and NS+Sm for all plant developmental phases to represent the  
228 experimental design.

229

## 230 RESULTS

231 After quality filtering and removal of non-target sequences, we recovered 1,608,688 reads  
232 (average 9,353 reads per sample) that were grouped into 23,894 amplicon sequence variants.  
233 Sampling curves within most samples were saturating (NS+NSm, NS+Sm+Ni, NS+Sm+D)  
234 indicating a robust sampling of the microbial diversity associated with individual plants while  
235 serpentine soils did not fully saturate (S+Sm, S+NSm) (Supplemental Figures 1-6). To compare  
236 among samples, count data were normalized by relative abundance in a sample.

237

### 238 *Soil treatment and plant developmental phase influence species richness and community* 239 *similarity*

240 Bacteria from the phyla Proteobacteria or Acidobacteria comprised nearly 90% of reads from  
241 most samples depending on soil chemistry (Figure 1a). Alpha diversity differed among soil  
242 chemistries (Figure 1b;  $F_{3,100} = 124.05$ ,  $P < 0.001$ ) and plant developmental phase ( $F_{4,100} = 5.74$ ,  
243  $P = < 0.001$ ), but not microbe source ( $F_{1,100} = 2.64$ ,  $P = 0.107$ ). There was a significant  
244 interaction between soil chemistry and microbe source ( $F_{1,100} = 6.80$ ,  $P = 0.011$ ) as well as soil  
245 chemistry, microbe source, and plant developmental phase ( $F_{5,100} = 4.08$ ,  $P = 0.004$ ) on bacterial  
246 composition. The serpentine soil treatments (S+Sm and S+NSm) had lower alpha diversity at all  
247 time points compared to all treatments with nonserpentine soils (NS+Sm, NS+Sm+Ni,  
248 NS+Sm+D). The treatment with simulated drought (NS+Sm+D) treatment had higher species  
249 richness than either the live nonserpentine treatment (NS+NSm) or the treatment with nickel  
250 added (NS+Sm+Ni).

251

252 Bacterial community composition in the rhizosphere varied with soil chemistry and plant  
253 developmental phase, with surprisingly minimal contribution from the microbial source (Figure  
254 2; Table 1). Variability in bacterial communities among plants (beta diversity) was associated  
255 with soil chemistry (Betadisper:  $F_{3,128} = 93.67$ ,  $P = 0.001$ ) and plant developmental phases  
256 (Betadisper:  $F_{4,127} = 5.79$ ,  $P = 0.004$ ), but only weakly with microbe source (Betadisper:  $F_{1,130} =$   
257  $3.42$ ,  $P = 0.068$ ). Microbial communities from the seedling phase were less variable than all  
258 other plant developmental phases, but there were no significant differences between the  
259 variability of other phases. Both serpentine soil treatments were less variable than that of either  
260 nonserpentine soil treatments.

261

### 262 *Plant growth responses to soil chemistry and microbial source*

263 In general, the height, leaf number, aboveground dried biomass, root length, root diameter, root  
264 surface area, and root volume were all impacted by soil chemistries (Figures 3 and 4; Table 2 and  
265 3). The interaction between plant developmental phase and microbe source as well as soil  
266 chemistry and microbe source also influenced these plant traits. Microbe source, alone, only  
267 significantly influenced root diameter.

268

### 269 *Serpentine microbes alter plant vegetative and flowering phenology*

270 Cox proportional hazards regression models showed differences in plant progression through  
271 developmental phases among treatments (Table 4). Plants associated with serpentine microbes  
272 reached the post-seedling vegetative phase and flowered earlier than those associated with  
273 nonserpentine microorganisms (Table 4).

274

275

### 276 *Bacterial taxa*

277 DESeq2 identified taxa that were differentially abundant according to soil type (Figure 5,  
278 Supplemental Figure 7-8). *Solirubrobacter*, *Lactobacillus*, and *Methylobacterium* were genera  
279 that were of particular interest. *Solirubrobacter* were present in all treatments with nonserpentine  
280 soils and absent in both treatments with serpentine soils. *Lactobacillus* were present in both  
281 serpentine soil treatments. *Methylobacterium* were most abundant in the NS+NSm, NS+Sm, and  
282 S+Sm treatments.

283

## 284 DISCUSSION

285 The role of rhizosphere microbes in plant health is increasingly recognized, but efforts to manage  
286 or alter rhizosphere composition require understanding the relative importance of soil chemistry,  
287 microbial species pools and plant development in assembly processes. In comparing serpentine  
288 to nonserpentine soils and microbial sources, we found that soil chemistry exerts that strongest  
289 influence on microbial community composition, with more minor changes with plant phenology  
290 and with microbial source. Plant phenology was also impacted by soil chemistry and microbe  
291 source with plants growing in serpentine soils having a delayed vegetative and flowering  
292 phenology. Changes in flowering phenology can have an impact on life-history traits and  
293 population dynamics (Dorji et al. 2013; Yang et al. 2020).

294

295

296 *Soil chemistry and plant developmental phase both significantly impact microbial diversity and*  
297 *community composition*

298 Here, rhizosphere alpha diversity generally increased with plant developmental phase and was  
299 generally higher when plants were grown in nonserpentine soils, which allowed plants to grow  
300 larger. Previous research found no or minimal difference in bacterial alpha diversity between  
301 serpentine and nonserpentine soils (Oline 2006; Igwe and Vannette 2019). Consistent with our  
302 previous research, plants grown on nonserpentine soils showed increased alpha diversity,  
303 suggesting that plant growth rather than the diversity of microbes in the species pool is more  
304 important in determining bacterial diversity in the rhizosphere. This may be due to accumulation  
305 of microbes simply due to the amount of time the plants spent in soil (Dombrowski et al. 2017)  
306 or changes in the amount or type of exudates deposited in the rhizosphere (Chaparro et al. 2013;  
307 Zhalnina et al. 2018).

308

309 The largest change between microbial composition occurred between the start of the experiment  
310 and the seedling phase. After the seedling phase, the microbial community composition  
311 stabilized. This occurrence is in line with previous research in rice that showed similar results  
312 (Edwards et al. 2018). Some microbial communities in the serpentine soil treatments at the  
313 flowering phases shift to look more similar to those associated with nonserpentine *P. erecta*.

314 Therefore, some convergence is occurring; however, in this experiment, soil chemistry  
315 contributed more to the observed beta diversity in the microbial community than plant  
316 developmental phase, even at later phases.

317  
318 Various mechanisms could contribute to the observed results. For example, the presence of DNA  
319 from dead cells that saturated sequencing efforts relative to new DNA. The soil could also exert  
320 a selective pressure that is stronger than that of *P. erecta* rhizosphere. Alternatively, is possible  
321 that some serpentine microbes that grow well in nonserpentine soils and vice versa. It has been  
322 shown that serpentine and nonserpentine soils can host the same microbes with varying  
323 accessory genomes (Porter et al. 2017). Shotgun sequencing or whole genome sequencing could  
324 identify if the same microbes with distinct genotypes grew in reciprocal soil chemistries. By  
325 exuding carbon compounds, phenolic acids, and amino acids, plants can enhance the growth of  
326 specific beneficial or pathogenic members of the soil microbial community, which can enhance  
327 plant growth in some cases (Paterson et al. 2007). Root exudates change over the course of plant  
328 development where younger plants exude more sugars while older plants exude more complex  
329 carbon compounds. Characterizing root exudation of *P. erecta* over plant development and  
330 correlating the results with changes in microbial community composition can provide greater  
331 insight into the role of dynamic plant exudation on survival in serpentine and nonserpentine  
332 soils.

333  
334 Our study cannot disentangle the possible mechanisms that contribute to the observed results.  
335 We sampled plants at distinct development phases irrespective of soil residence time which is an  
336 experimental design that considers that plant development phase was shown to influence the  
337 rhizosphere microbial community separately from chronological age (Edwards et al. 2018). In  
338 addition, our study was performed in a growth chamber, preventing the opportunity for microbial  
339 immigration from the soil, which could affect microbial diversity and composition in the field.

340  
341 *Soil microbial community and soil chemistry influence time to vegetative growth and flowering*  
342 Our reciprocal transplants revealed that serpentine microorganisms, when in non-serpentine  
343 soils, accelerate vegetative, early flowering, and flowering phenology (Table 4). The importance  
344 of the microbial community for time to flowering has been previously demonstrated in

345 *Arabidopsis* (Wagner et al. 2014) and *Ipomea purpurea* (Chaney and Baucom 2020). Drought-  
346 adapted microbes accelerated flowering in *Brassica* when compared to non-drought-adapted  
347 microbes (Lau and Lennon 2012). A few mechanisms for microbial effects on phenology have  
348 been proposed including nutrient availability, production of plant hormones or their precursors,  
349 or by exacerbating stress. However, flowering was delayed in the presence of serpentine  
350 microbes grown in nonserpentine soils (Table 4), which have been previously demonstrated to be  
351 more nutrient-rich than serpentine soils (Brady et al. 2005), suggesting another mechanism may  
352 underlie microbial effects in this experiment. It may be that microbes produce plant hormones  
353 such as indole acetic acid (IAA) which plays a significant role in flowering time. Nitrogen can be  
354 converted to tryptophan and then to IAA and increases time to flowering (Lu et al. 2018).  
355 Alternatively, flowering time has been shown to be impacted by biotic stress (Kazan and Lyons  
356 2016). It is possible that introducing non-adapted microorganisms to non-serpentine soils may  
357 constitute a biotic stressor that can induce changes in plant phenology.

358  
359 Thirty-four genera across 5 phyla were shown to be differentially abundant between soil  
360 treatments by DESeq2 analysis. Of particular interest are *Solirubrobacter* which were only  
361 detected in nonserpentine soil treatments, *Lactobacillus* which characterized serpentine soil  
362 treatments, and *Methylobacterium* which were most abundant in NS+NSm, S+Sm, and NS+Sm  
363 treatments. *Solirubrobacter* are gram-positive, non-motile bacteria that has been identified and  
364 isolated from bulk soil, rhizosphere, and endosphere environments (Wei et al. 2014;  
365 Albuquerque and Da Costa 2014). In general, it has been shown to associate with high soil  
366 quality (Gravuer and Eskelinen 2017; Lopez et al. 2017; Sánchez-Marañón et al. 2017).  
367 Nonserpentine soils are generally more nutrient-rich than serpentine soils and this may influence  
368 the abundance of *Solirubrobacter* observed in the nonserpentine soil treatments. *Lactobacillus*  
369 are lactic acid bacteria (LAB) that are gram-positive and microaerophilic. Plasmids comprise up  
370 to 4.8% of LAB total gene content and are important for growth in the diverse, yet specific  
371 environments where these bacteria are found (Makarova et al. 2006). *Lactobacillus* have been  
372 shown to be metallotolerant and have the ability to bind heavy metals and protect against metal-  
373 induced oxidative stress (Li et al. 2017; Liu et al. 2019; Barman et al. 2020). Their abundance in  
374 serpentine soil treatments may reflect these phenotypic properties as serpentine soils have high  
375 concentrations of heavy metals. *Enterobacter*, which was most abundant in the NS+Sm+Drought

376 treatment, has been shown to have plant-growth-promoting properties such as phosphorus  
377 solubility and ACC deaminase activity (Danish et al. 2020). Its application to *Sorghum bicolor*  
378 (L.) Moench increased the plants root architecture and ability to tolerate stress (Govindasamy et  
379 al. 2020). *Methylobacterium* (order *Rhizobiales*) belong to the same family as *Microvirga*, which  
380 has previously been shown to associate with legumes and non-legumes on serpentine soils (Igwe  
381 and Vannette 2019). In addition members of *Methylobacterium* can produce auxins and induce  
382 root nodulation (Kelly et al. 2014) and can promote plant growth through the production of ACC  
383 deaminase (Belimov et al. 2019; Sharma et al. 2021).

384

385 *Serpentine soils increase root diameter, but have no impact or decrease other plant growth*  
386 *metrics*

387 *Plantago erecta* grown in serpentine soils were shorter, and generally smaller than those grown  
388 in nonserpentine soils as has been documented previously (O'Dell and Rajakaruna 2004;  
389 Kayama et al. 2005). Root length, surface area, and volume were smallest in serpentine soils  
390 while root diameter was the largest in this soil chemistry aligning with previous work that  
391 demonstrated that heavy-metal tolerant species of *Arabidopsis arenosa* and *Arabidopsis halleri*  
392 have thicker roots than the heavy-metal sensitive *Arabidopsis thaliana* (Staňová et al. 2012).  
393 Although all *P. erecta* growing in nonserpentine soils were larger than those in serpentine soils,  
394 only the plants in the NS+Sm soil treatment flowered sooner relative to the live serpentine  
395 (S+Sm) treatment. Collectively, differences in plant size and vegetative and flowering phenology  
396 between *P. erecta* on serpentine or nonserpentine soils are important for a plant's life history  
397 (Metcalf et al. 2019). Plants that flower, set seed, and then die generally flower at the size that  
398 will ensure the best reproductive success (Metcalf et al. 2003). Continued research could  
399 determine how local adaptation of microbial communities influence reproductive success in  
400 plants growing in serpentine and nonserpentine soils.

401

402 Ecologically, competition for resources impact plant size. Soil nutrients, in particular, impact  
403 root architecture. Additionally, smaller plants are less vulnerable to drought (Olson et al. 2018).  
404 Phosphate deficiency, for example, produces plants that increase lateral root production over  
405 primary root production (López-Bucio et al. 2003). Plant-growth-promoting bacteria (PFPB) is  
406 one mechanism by which plants can access nutrients and defend against pathogenic bacteria

407 (Glick 2012). A few direct plant-growth promoting methods that would be important in  
408 serpentine soils include phosphorus solubilization, metal chelation, and the production of extra-  
409 polymeric substances (EPS). Together, these traits would increase nutrient availability, decrease  
410 metal availability, and increase the water-holding capacity of the soil for the plant. Still, the  
411 ability of the microbes to confer benefits to plants growing on serpentine soils is dependent on  
412 local adaption of the microbes to serpentine (Rúa et al. 2016; Porter et al. 2016, 2019). Root  
413 diameter was the only plant trait that was larger in serpentine soils relative to nonserpentine soils  
414 and removing microbes that were locally adapted to serpentine soils removed this advantage.  
415 Conversely, replacing microbes that were locally adapted to nonserpentine with microbes that  
416 were locally adapted to serpentine contributed to plants that flowered sooner than other  
417 treatments.

418

## 419 CONCLUSIONS

420 The root-associated microbial communities of *Plantago erecta* grown in serpentine and  
421 nonserpentine soils with adapted or non-adapted microorganisms have differing alpha and beta  
422 diversities. Notably, *P. erecta* grown in nonserpentine soils with serpentine microorganisms  
423 experienced accelerated vegetative and flowering phenology as they entered the vegetative, early  
424 flowering and late flowering phase before any plants that were grown in live serpentine soils  
425 (S+Sm) or live nonserpentine soil (NS+NSm). Above- and below-ground development on *P.*  
426 *erecta* on serpentine soil treatments were less than those grown on nonserpentine soil treatments.  
427 Overall, our results support a role of locally adapted microorganisms in impacting plant  
428 phenology despite minimal effects on other measurable aspects of plant phenotype.

429

## 430 CONFLICT OF INTERESTS

431 Authors declare no conflict of interests in this project

432

## 433 ACKNOWLEDGEMENTS

434 This work was made possible by the University of California Natural Reserve System  
435 (McLaughlin Natural Reserve) Reserve DOI: (<https://doi.org/10.21973/N3W08D>). We thank  
436 Cathy Koehler for assistance at McLaughlin Natural Reserve. We would like to thank Imade Ojo  
437 and Shenwen Gu who helped set up the experiment. Thanks to the California Native Plant  
438 Society, Davis Botanical Society Student Research Grant, Jastro Research Scholarship Award,  
439 and Natural Reserve System Graduate Student Grant Program for providing funds for the

440 research. We are thankful to members of the Vannette Lab who provided feedback on  
441 manuscript drafts.  
442



443 REFERENCES

- 444 Akhtar MS, Siddiqui ZA, Wiemken A (2011) Arbuscular Mycorrhizal Fungi and Rhizobium to  
445 Control Plant Fungal Diseases. In: Lichtfouse E (ed) Alternative Farming Systems,  
446 Biotechnology, Drought Stress and Ecological Fertilisation. Springer Netherlands,  
447 Dordrecht, pp 263–292
- 448 Albuquerque L, Da Costa MS (2014) The families Conexibacteraceae, Patulibacteraceae and  
449 Solirubrobacteraceae. In: The Prokaryotes: Actinobacteria. Springer-Verlag Berlin  
450 Heidelberg, pp 185–200
- 451 Anacker BL (2014) The nature of serpentine endemism. *Am J Bot* 101:219–224. doi:  
452 10.3732/ajb.1300349
- 453 Barillot CDC, Sarde C-O, Bert V, et al (2013) A standardized method for the sampling of  
454 rhizosphere and rhizoplan soil bacteria associated to a herbaceous root system. *Ann*  
455 *Microbiol* 63:471–476. doi: 10.1007/s13213-012-0491-y
- 456 Barman D, Jha DK, Bhattacharjee K (2020) Metallotolerant bacteria: Insights into bacteria  
457 thriving in metal-contaminated areas. In: *Microbial Versatility in Varied Environments:*  
458 *Microbes in Sensitive Environments*. Springer Singapore, pp 135–164
- 459 Belimov AA, Zinovkina NY, Safronova VI, et al (2019) Rhizobial ACC deaminase contributes  
460 to efficient symbiosis with pea (*Pisum sativum* L.) under single and combined cadmium and  
461 water deficit stress. *Environ Exp Bot* 167:103859. doi: 10.1016/j.envexpbot.2019.103859
- 462 Berg G, Smalla K (2009) Plant species and soil type cooperatively shape the structure and  
463 function of microbial communities in the rhizosphere. *FEMS Microbiol Ecol* 68:1–13. doi:  
464 10.1111/j.1574-6941.2009.00654.x
- 465 Brady KU, Kruckeberg AR, Bradshaw Jr. HD (2005) Evolutionary ecology of plant adaptation to  
466 serpentine soils. *Annu Rev Ecol Evol Syst* 36:243–266. doi:  
467 10.1146/annurev.ecolsys.35.021103.105730
- 468 Calderón K, Spor A, Breuil MC, et al (2017) Effectiveness of ecological rescue for altered soil  
469 microbial communities and functions. *ISME J* 11:272–283. doi: 10.1038/ismej.2016.86
- 470 Callahan BJ, McMurdie PJ, Rosen MJ, et al (2016a) DADA2: High-resolution sample inference  
471 from Illumina amplicon data. *Nat Methods* 13:581–583. doi: 10.1038/nmeth.3869
- 472 Callahan BJ, Sankaran K, Fukuyama JA, et al (2016b) Bioconductor workflow for microbiome  
473 data analysis: from raw reads to community analyses. *F1000Research* 5:1492. doi:  
474 10.12688/f1000research.8986.2
- 475 Chaney L, Baucom RS (2020) The soil microbial community alters patterns of selection on  
476 flowering time and fitness-related traits in *Ipomoea purpurea*. *Am J Bot* 107:186–194. doi:  
477 10.1002/ajb2.1426
- 478 Chaparro JM, Badri D V, Bakker MG, et al (2013) Root exudation of phytochemicals in  
479 *Arabidopsis* follows specific patterns that are developmentally programmed and correlate  
480 with soil microbial functions. *PLoS One* 8:e55731. doi: 10.1371/journal.pone.0055731
- 481 Chaparro JM, Badri D V, Vivanco JM (2014) Rhizosphere microbiome assemblage is affected  
482 by plant development. *ISME J* 8:790–803. doi: 10.1038/ismej.2013.196
- 483 Comeau AM, Li WKW, Tremblay JÉ, et al (2011) Arctic ocean microbial community structure  
484 before and after the 2007 record sea ice minimum. *PLoS One* 6:. doi:  
485 10.1371/journal.pone.0027492
- 486 Cui QG, He WM (2009) Soil biota, but not soil nutrients, facilitate the invasion of *Bidens pilosa*  
487 relative to a native species *Saussurea deltoidea*. *Weed Res* 49:201–206. doi:  
488 10.1111/j.1365-3180.2008.00679.x

- 489 Danish S, Zafar-Ul-Hye M, Hussain S, et al (2020) Mitigation of drought stress in maize through  
490 inoculation with drought tolerant ACC deaminase containing PGPR under axenic  
491 conditions. *Pakistan J Bot* 52:49–60. doi: 10.30848/PJB2020-1(7)
- 492 De Curtis F, Lima G, Vitullo D, De Cicco V (2010) Biocontrol of *Rhizoctonia solani* and  
493 *Sclerotium rolfsii* on tomato by delivering antagonistic bacteria through a drip irrigation  
494 system. *Crop Prot* 29:663–670. doi: 10.1016/j.cropro.2010.01.012
- 495 Dombrowski N, Schlaeppli K, Agler MT, et al (2017) Root microbiota dynamics of perennial  
496 *Arabis alpina* are dependent on soil residence time but independent of flowering time. *ISME*  
497 *J* 11:43–55. doi: 10.1038/ismej.2016.109
- 498 Dorji T, Totland Ø, Moe SR, et al (2013) Plant functional traits mediate reproductive phenology  
499 and success in response to experimental warming and snow addition in Tibet. *Glob Chang*  
500 *Biol* 19:459–472. doi: 10.1111/gcb.12059
- 501 Edwards JA, Santos-Medellín CM, Liechty ZS, et al (2018) Compositional shifts in root-  
502 associated bacterial and archaeal microbiota track the plant life cycle in field-grown rice.  
503 *PLoS Biol* 16:. doi: 10.1371/journal.pbio.2003862
- 504 Emami S, Alikhani HA, Pourbabaei AA, et al (2018) Improved growth and nutrient acquisition  
505 of wheat genotypes in phosphorus deficient soils by plant growth-promoting rhizospheric  
506 and endophytic bacteria. *Soil Sci Plant Nutr* 64:719–727. doi:  
507 10.1080/00380768.2018.1510284
- 508 Farrer EC, Suding KN (2016) Teasing apart plant community responses to N enrichment: the  
509 roles of resource limitation, competition and soil microbes. *Ecol Lett* 19:1287–1296. doi:  
510 10.1111/ele.12665
- 511 Fei H, Crouse M, Papadopoulos YA, Vessey JK (2020) Improving biomass yield of giant  
512 *Miscanthus* by application of beneficial soil microbes and a plant biostimulant. *Can J Plant*  
513 *Sci* 100:29–39. doi: 10.1139/cjps-2019-0012
- 514 Fenner M (1998) The phenology of growth and reproduction in plants. *Perspect Plant Ecol Evol*  
515 *Syst* 1:78–91. doi: <https://doi.org/10.1078/1433-8319-00053>
- 516 Glick BR (2012) Plant Growth-Promoting Bacteria: Mechanisms and Applications. 963401:. doi:  
517 10.6064/2012/963401
- 518 Glöckner FO, Yilmaz P, Quast C, et al (2017) 25 years of serving the community with ribosomal  
519 RNA gene reference databases and tools. *J Biotechnol* 261:169–176. doi:  
520 10.1016/j.jbiotec.2017.06.1198
- 521 Gouda S, Kerry RG, Das G, et al (2018) Revitalization of plant growth promoting rhizobacteria  
522 for sustainable development in agriculture. *Microbiol Res* 206:131–140. doi:  
523 10.1016/j.micres.2017.08.016
- 524 Govindasamy V, George P, Kumar M, et al (2020) Multi-trait PGP rhizobacterial endophytes  
525 alleviate drought stress in a senescent genotype of sorghum [*Sorghum bicolor* (L.) Moench].  
526 *3 Biotech* 10:13. doi: 10.1007/s13205-019-2001-4
- 527 Gravuer K, Eskelinen A (2017) Nutrient and rainfall additions shift phylogenetically estimated  
528 traits of soil microbial communities. *Front Microbiol* 8:1–16. doi:  
529 10.3389/fmicb.2017.01271
- 530 Haichar FEZ, Marol C, Berge O, et al (2008) Plant host habitat and root exudates shape soil  
531 bacterial community structure. *ISME J* 2:1221–1230. doi: 10.1038/ismej.2008.80
- 532 Hidalgo-Triana N, Pérez-Latorre A V. (2018) Phenological patterns in Mediterranean south  
533 Iberian serpentine flora. *Nord J Bot* 36:1–11. doi: 10.1111/njb.02028
- 534 Igwe AN, Vannette RL (2019) Bacterial communities differ between plant species and soil type,

- 535 and differentially influence seedling establishment on serpentine soils. *Plant Soil* 441:423–  
536 437. doi: 10.1007/s11104-019-04135-5
- 537 Kaisermann A, de Vries FT, Griffiths RI, Bardgett RD (2017) Legacy effects of drought on  
538 plant–soil feedbacks and plant–plant interactions. *New Phytol* 215:1413–1424. doi:  
539 10.1111/nph.14661
- 540 Kandlikar GS, Johnson CA, Yan X, et al (2019) Winning and losing with microbes: how  
541 microbially mediated fitness differences influence plant diversity. *Ecol Lett* 22:1178–1191.  
542 doi: 10.1111/ele.13280
- 543 Kassambara A, Kosinski M (2018) survminer: Drawing Survival Curves using “ggplot2”. R  
544 package version 0.4.3
- 545 Kayama M, Quoreshi AM, Uemura S, Koike T (2005) Differences in growth characteristics and  
546 dynamics of elements absorbed in seedlings of three spruce species raised on serpentine soil  
547 in northern Japan. *Ann Bot* 95:661–672. doi: 10.1093/aob/mci063
- 548 Kazan K, Lyons R (2016) The link between flowering time and stress tolerance. *J Exp Bot*  
549 67:47–60. doi: 10.1093/jxb/erv441
- 550 Kelly DP, McDonald IR, Wood AP (2014) The Family Methylobacteriaceae. In: Rosenberg E,  
551 DeLong EF, Lory S, et al. (eds) *The Prokaryotes*. Springer, Berlin, Heidelberg, pp 313–340
- 552 Kwak MJ, Kong HG, Choi K, et al (2018) Rhizosphere microbiome structure alters to enable  
553 wilt resistance in tomato. *Nat Biotechnol* 36:1100–1116. doi: 10.1038/nbt.4232
- 554 Lau JA, Lennon JT (2012) Rapid responses of soil microorganisms improve plant fitness in  
555 novel environments. *Proc Natl Acad Sci* 109:14058–14062. doi: 10.1073/pnas.1202319109
- 556 Li B, Jin D, Yu S, et al (2017) In Vitro and in Vivo evaluation of *Lactobacillus delbrueckii*  
557 subsp. *Bulgaricus* KLDS1.0207 for the alleviative effect on lead toxicity. *Nutrients* 9:. doi:  
558 10.3390/nu9080845
- 559 Liu, Zheng, Ma, et al (2019) Evaluation and Proteomic Analysis of Lead Adsorption by Lactic  
560 Acid Bacteria. *Int J Mol Sci* 20:5540. doi: 10.3390/ijms20225540
- 561 López-Bucio J, Cruz-Ramírez A, Herrera-Estrella L (2003) The role of nutrient availability in  
562 regulating root architecture. *Curr Opin Plant Biol* 6:280–287. doi: 10.1016/S1369-  
563 5266(03)00035-9
- 564 Lopez S, Piutti S, Vallance J, et al (2017) Nickel drives bacterial community diversity in the  
565 rhizosphere of the hyperaccumulator *Alyssum murale*. *Soil Biol Biochem* 114:121–130.  
566 doi: 10.1016/j.soilbio.2017.07.010
- 567 Lu T, Ke M, Lavoie M, et al (2018) Rhizosphere microorganisms can influence the timing of  
568 plant flowering. *Microbiome* 6:. doi: 10.1186/s40168-018-0615-0
- 569 Makarova K, Slesarev A, Wolf Y, et al (2006) Comparative genomics of the lactic acid bacteria.  
570 *Proc Natl Acad Sci U S A* 103:15611–15616. doi: 10.1073/pnas.0607117103
- 571 McMurdie PJ, Holmes S (2013) Phyloseq: An R Package for Reproducible Interactive Analysis  
572 and Graphics of Microbiome Census Data. *PLoS One* 8:. doi:  
573 10.1371/journal.pone.0061217
- 574 Metcalf CJE, Henry LP, Rebolledo-Gómez M, Koskella B (2019) Why evolve reliance on the  
575 microbiome for timing of ontogeny? *MBio* 10:1–10. doi: 10.1128/mBio.01496-19
- 576 Metcalf JC, Rose KE, Rees M (2003) Evolutionary demography of monocarpic perennials.  
577 *Trends Ecol Evol* 18:471–480. doi: 10.1016/S0169-5347(03)00162-9
- 578 Murgese P, Santamaria P, Leoni B, Crecchio C (2020) Ameliorative Effects of PGPB on Yield,  
579 Physiological Parameters, and Nutrient Transporter Genes Expression in *Barattiere*  
580 (*Cucumis melo* L.). *J Soil Sci Plant Nutr* 20:784–793. doi: 10.1007/s42729-019-00165-1

- 581 O'Dell RE, James JJ, Richards JH (2006) Congeneric serpentine and nonserpentine shrubs differ  
582 more in leaf Ca:Mg than in tolerance of low N, low P, or heavy metals. *Plant Soil* 280:49–  
583 64. doi: 10.1007/s11104-005-3502-y
- 584 O'Dell RE, Rajakaruna N (2004) Intraspecific Variation, Adaptation, and Evolution. In: Harrison  
585 S, Rajakaruna N (eds) *Serpentine: The Evolution and Ecology of a Model System*. pp 97–  
586 138
- 587 Oksanen J, Blanchet FG, Friendly M, et al (2019) *Vegan: Community Ecology Package* (version  
588 2.5-6)
- 589 Oline DK (2006) Phylogenetic comparisons of bacterial communities from serpentine and  
590 nonserpentine soils. *Appl Environ Microbiol* 72:6965–6971. doi: 10.1128/AEM.00690-06
- 591 Olson ME, Soriano D, Rosell JA, et al (2018) Plant height and hydraulic vulnerability to drought  
592 and cold. *Proc Natl Acad Sci U S A* 115:7551–7556. doi: 10.1073/pnas.1721728115
- 593 Orlandini V, Emiliani G, Fondi M, et al (2014) Network Analysis of Plasmidomes: The  
594 *Azospirillum brasilense* Sp245 Case. *Int J Evol Biol* 2014:1–14. doi: 10.1155/2014/951035
- 595 Paterson E, Gebbing T, Abel C, et al (2007) Rhizodeposition shapes rhizosphere microbial  
596 community structure in organic soil. *New Phytol* 173:600–610. doi: 10.1111/j.1469-  
597 8137.2006.01931.x
- 598 Porter SS, Bantay R, Friel CA, et al (2019) Beneficial microbes ameliorate abiotic and biotic  
599 sources of stress on plants. doi: 10.1111/1365-2435.13499
- 600 Porter SS, Chang PL, Conow CA, et al (2017) Association mapping reveals novel serpentine  
601 adaptation gene clusters in a population of symbiotic *Mesorhizobium*. *ISME J* 11:248–262.  
602 doi: 10.1038/ismej.2016.88
- 603 Porter SS, Chang PL, Conow CA, et al (2016) Association mapping reveals novel serpentine  
604 adaptation gene clusters in a population of symbiotic *Mesorhizobium*. *Isme J* 11:248
- 605 Quast C, Pruesse E, Yilmaz P, et al (2012) The SILVA ribosomal RNA gene database project:  
606 improved data processing and web-based tools. *Nucleic Acids Res* 41:D590–D596. doi:  
607 10.1093/nar/gks1219
- 608 Ravichandran KR, Thangavelu M (2017) Role and influence of soil microbial communities on  
609 plant invasion. *Ecol Quest* 27:9–23. doi: 10.12775/EQ.2017.024
- 610 Rodríguez-Pérez J, Traveset A (2016) Effects of flowering phenology and synchrony on the  
611 reproductive success of a long-flowering shrub. *AoB Plants* 8:. doi: 10.1093/aobpla/plw007
- 612 Rossington N, Yost J, Ritter M (2018) Water Availability Influences Species Distributions on  
613 Serpentine Soils. *Madroño* 65:68–79. doi: 10.3120/0024-9637-65.2.68
- 614 Rúa MA, Antoninka A, Antunes PM, et al (2016) Home-field advantage? evidence of local  
615 adaptation among plants, soil, and arbuscular mycorrhizal fungi through meta-analysis.  
616 *BMC Evol Biol* 16:1–15. doi: 10.1186/s12862-016-0698-9
- 617 Safford AHD, Viers JH, Harrison SP (2005) Serpentine endemism in the California flora: a  
618 database of serpentine affinity. *Madrono* 52:222–257
- 619 Sakaguchi S, Horie K, Ishikawa N, et al (2019) Maintenance of soil ecotypes of *Solidago*  
620 *virgaurea* in close parapatry via divergent flowering time and selection against immigrants.  
621 *J Ecol* 107:418–435. doi: 10.1111/1365-2745.13034
- 622 Sánchez-Marañón M, Miralles I, Aguirre-Garrido JF, et al (2017) Changes in the soil bacterial  
623 community along a pedogenic gradient. *Sci Rep* 7:1–11. doi: 10.1038/s41598-017-15133-x
- 624 Schliep KP (2011) phangorn: Phylogenetic analysis in R. *Bioinformatics* 27:592–593. doi:  
625 10.1093/bioinformatics/btq706
- 626 Schneider A (2017) Flowering time evolution is independent of serpentine tolerance in the

- 627 California flora. *Ecosphere* 8:. doi: 10.1002/ecs2.1767
- 628 Sharma S, Chandra D, Sharma AK (2021) Rhizosphere Plant–Microbe Interactions Under  
629 Abiotic Stress. Springer, Singapore, pp 195–216
- 630 Sherrard ME, Maherali H (2006) the Adaptive Significance of Drought Escape in *Avena*  
631 *Barbata*, an Annual Grass. *Evolution* (N Y) 60:2478. doi: 10.1554/06-150.1
- 632 Staňová A, Ďurišová E, Banášová V, et al (2012) Root system morphology and primary root  
633 anatomy in natural non-metallicolous and metallicolous populations of three *Arabidopsis*  
634 species differing in heavy metal tolerance. *Biologia (Bratisl)* 67:505–516. doi:  
635 10.2478/s11756-012-0040-y
- 636 Therneau TM (2015) A Package for Survival Analysis in S. version 2.38
- 637 Van Der Heijden MGA, Bakker R, Verwaal J, et al (2006) Symbiotic bacteria as a determinant  
638 of plant community structure and plant productivity in dune grassland. *FEMS Microbiol*  
639 *Ecol* 56:178–187. doi: 10.1111/j.1574-6941.2006.00086.x
- 640 Wagner MR, Lundberg DS, Coleman-Derr D, et al (2014) Natural soil microbes alter flowering  
641 phenology and the intensity of selection on flowering time in a wild *Arabidopsis* relative.  
642 *Ecol Lett* 17:717–726. doi: 10.1111/ele.12276
- 643 Wei L, Ouyang S, Wang Y, et al (2014) *Solirubrobacter phytolaccae* sp. nov., an endophytic  
644 bacterium isolated from roots of *Phytolacca acinosa* Roxb. *Int J Syst Evol Microbiol*  
645 64:858–862. doi: 10.1099/ij.s.0.057554-0
- 646 Wright JW, Stanton ML, Scherson R (2006) Local adaptation to serpentine and non-serpentine  
647 soils in *Collinsia sparsiflora*. *Evol Ecol Res* 8:1–21
- 648 Yang X, Guo R, Knops JMH, et al (2020) Shifts in plant phenology induced by environmental  
649 changes are small relative to annual phenological variation. *Agric For Meteorol*  
650 294:108144. doi: 10.1016/j.agrformet.2020.108144
- 651 Yilmaz P, Parfrey LW, Yarza P, et al (2014) The SILVA and “all-species Living Tree Project  
652 (LTP)” taxonomic frameworks. *Nucleic Acids Res* 42:643–648. doi: 10.1093/nar/gkt1209
- 653 Zhalnina K, Louie KB, Hao Z, et al (2018) Dynamic root exudate chemistry and microbial  
654 substrate preferences drive patterns in rhizosphere microbial community assembly. *Nat*  
655 *Microbiol* 3:470–480. doi: 10.1038/s41564-018-0129-3

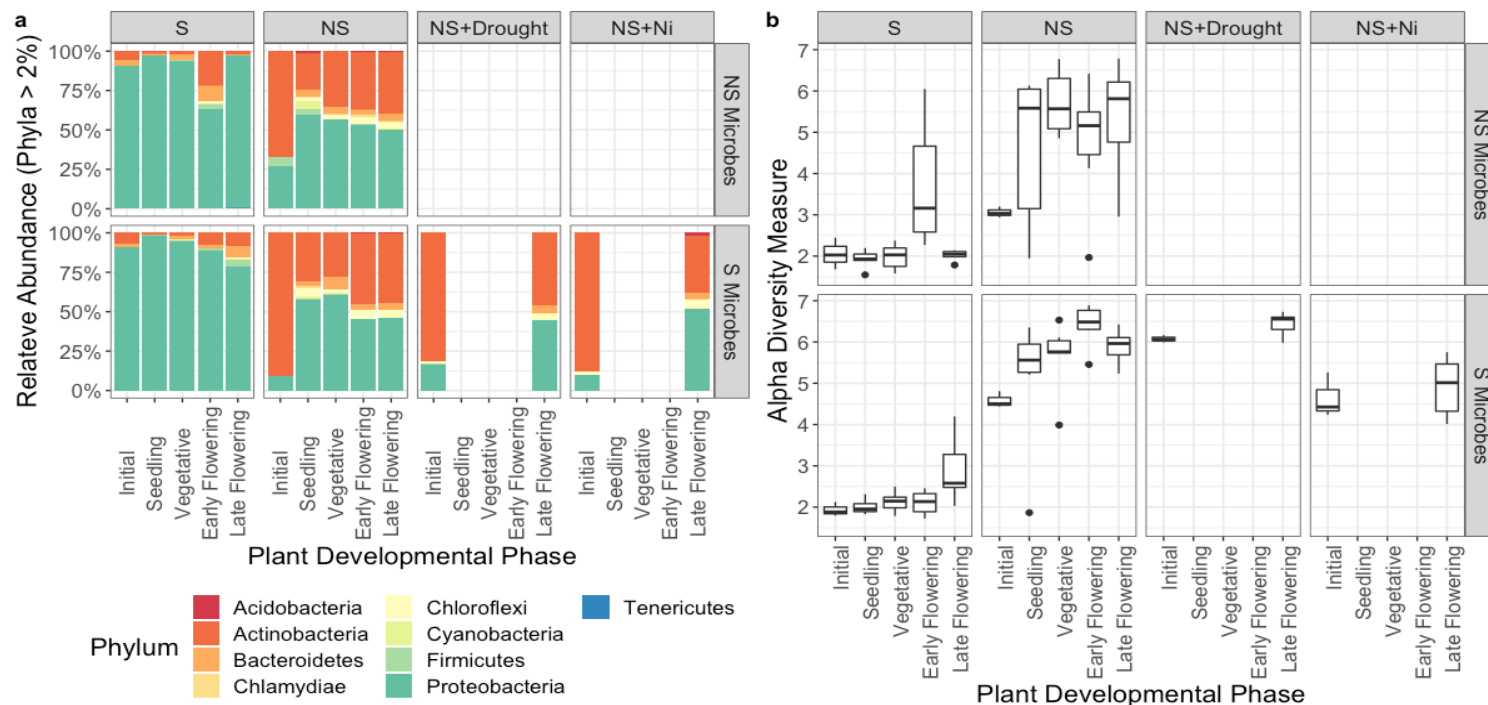

Figure 1 - Relative abundance and alpha diversity of bacterial community composition on roots of *Plantago erecta* across soil treatments and plant phenology.

(a) Bacterial phyla with a relative abundance of at least 2% are visualized in a bar graph faceted by plant developmental phase and soil treatment (S = Serpentine and NS = Nonserpentine). (b) Shannon diversity is significantly different between soil chemistries ( $F_{3,100} = 124.05$ ,  $P < 0.001$ ) and plant developmental phase ( $F_{4,100} = 5.74$ ,  $P < 0.001$ ), but not microbe source ( $F_{1,100} = 2.64$ ,  $P = 0.11$ ). There was a significant interaction between soil chemistry and microbe source ( $F_{1,100} = 6.80$ ,  $P = 0.011$ ) as well as soil chemistry, microbe source, and plant developmental phase ( $F_{5,100} = 4.08$ ,  $P = 0.004$ ).

657  
658

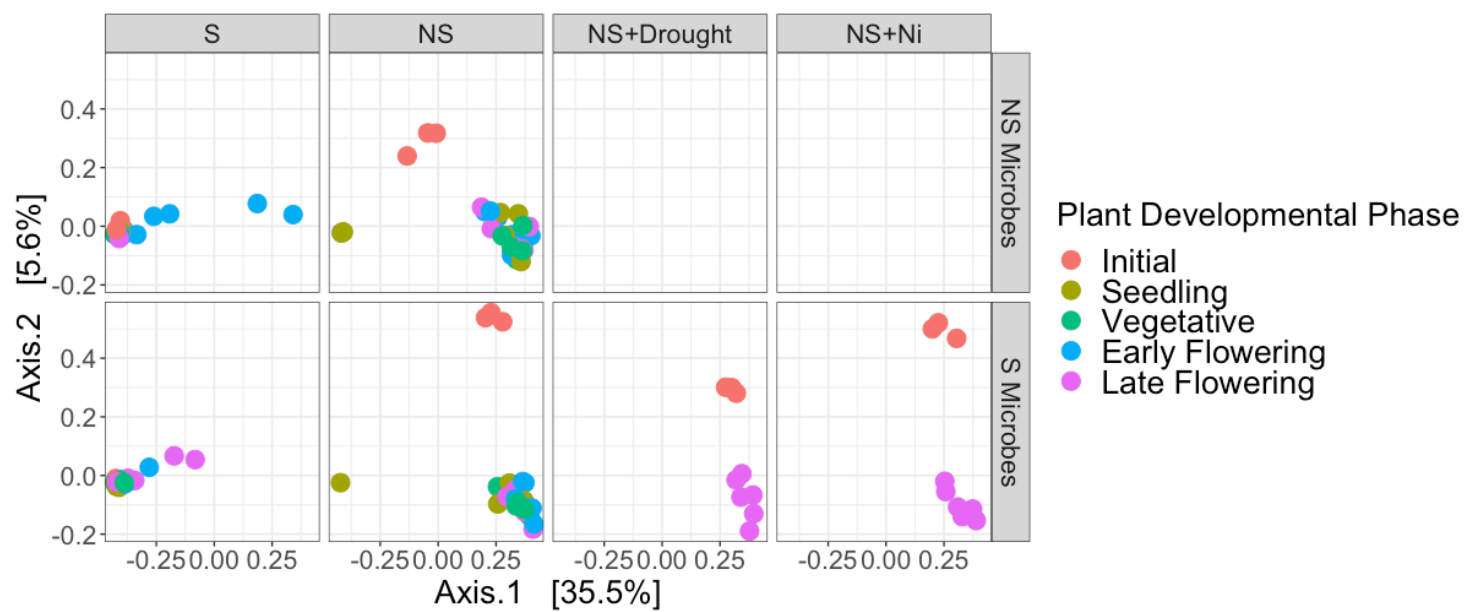

Figure 2 - PCoA of *Plantago erecta* rhizosphere bacterial communities across soil treatments and plant phenology using Bray-Curtis dissimilarity. Point color indicates plant developmental phase and panels indicate distinct soil treatments.

659  
660

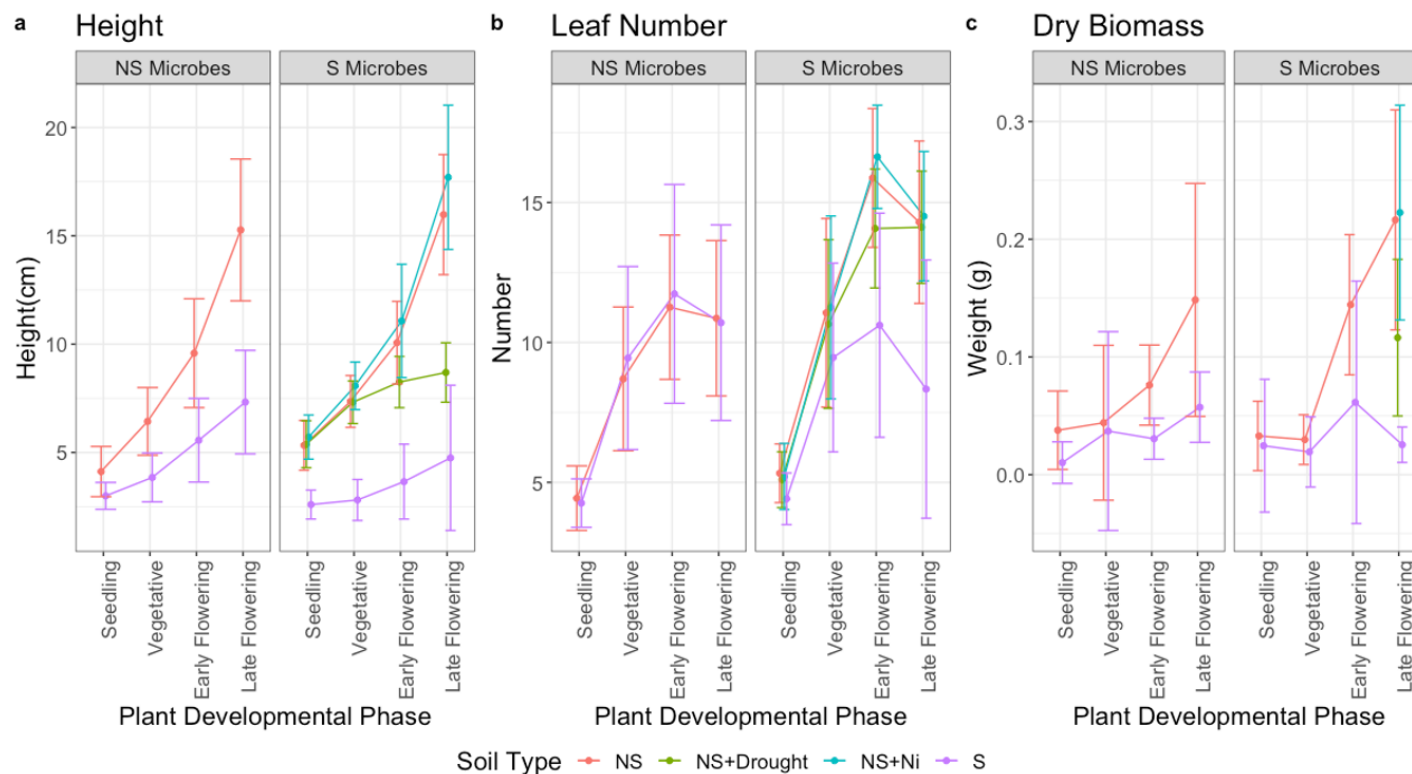

Figure 3 - Growth traits of *Plantago erecta* vary among soil treatments and plant developmental phase. Points indicate mean  $\pm$  1SD and points from soil treatments are connected, showing there is a significant difference between (a) height and (b) leaf number between soil treatment and plant developmental phase. Dry biomass (c) was significantly different between plant developmental phase, but not soil treatment.

661  
662  
663



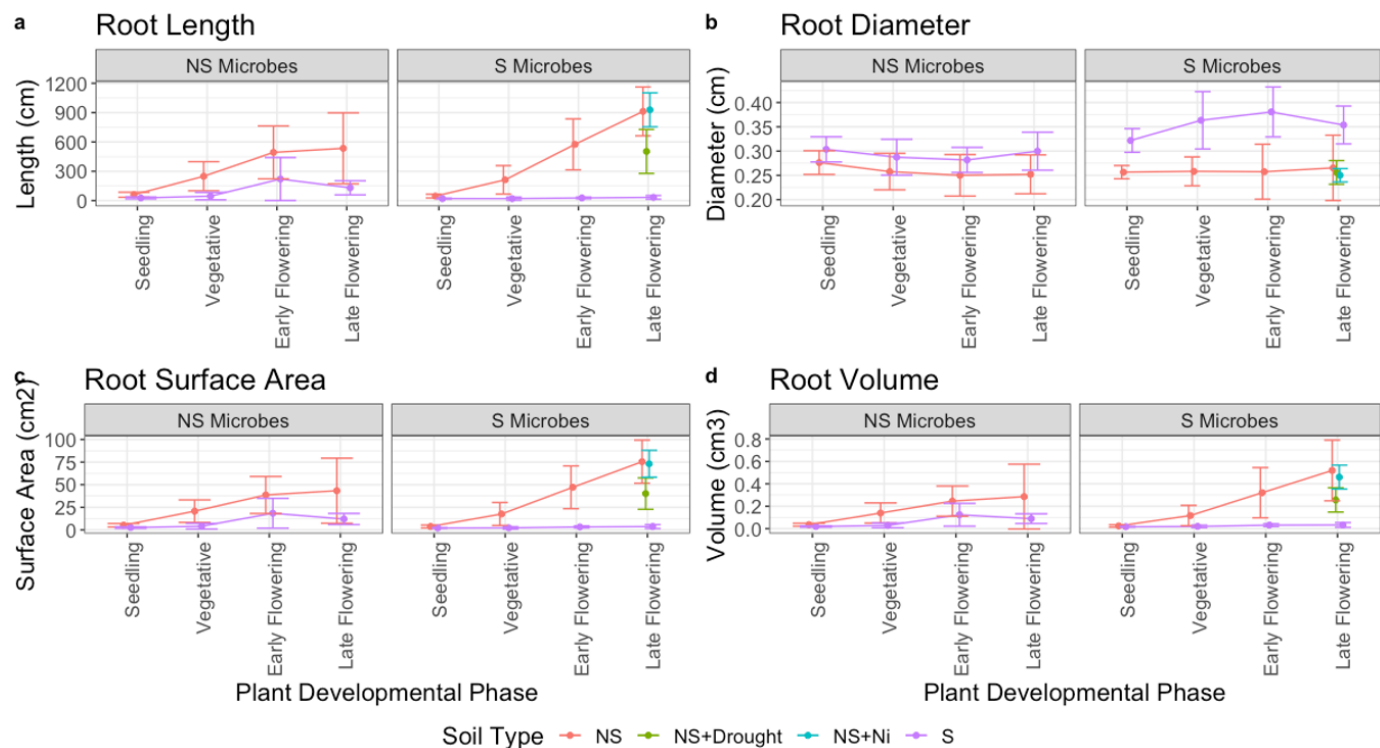

Figure 4 - Root growth traits vary among soil treatments and plant developmental phase.

Mean value for root traits and standard deviation show that (a) root length was significantly different across soil treatment and plant developmental phase. Root diameter (b) was different between soil treatments, but not plant developmental phase. Root surface area (c) and root volume (d) showed significant differences between plant developmental phases and soil treatments. The interaction between soil treatment and plant developmental phase influenced all root metrics.

664  
665

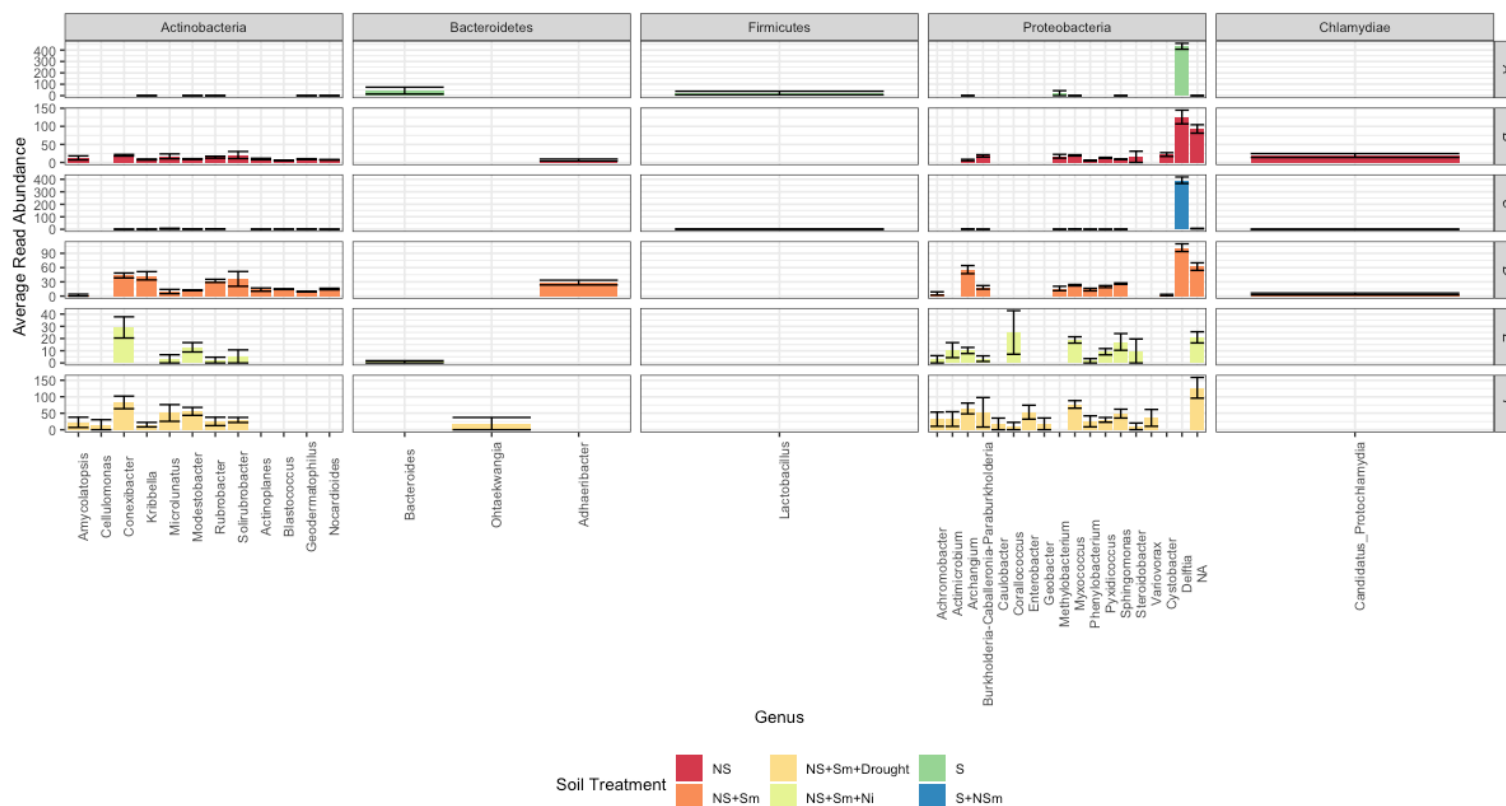

Figure 5 - Differentially abundant genera across soil treatments.

DESeq2 analysis showing ASVs that were differentially abundant between soil treatments (FDR <0.01). Bacterial genus is on the x-axis and relative average read abundance on the y-axis. Colors represent soil treatments (A=Serpentine soil and serpentine microbes, B=Nonserpentine soil and nonserpentine microbes, C=Serpentine soil and nonserpentine microbes, D=Nonserpentine soil and serpentine microbes, E=Nonserpentine soil and serpentine microbes and nickel stress, F=Nonserpentine soil and serpentine microbes and drought stress). Bars represent means +/- 1SE.

666  
667

Table 1 - Statistical analysis of microbial community dissimilarity using ANOVA. The predictors, degrees of freedom (df), number of samples (N), F-Value (F), Variation, and P-Value are listed

668

| Predictor                                    | df | N   | F     | R <sup>2</sup> | P     |
|----------------------------------------------|----|-----|-------|----------------|-------|
| Soil type                                    | 3  | 100 | 22.23 | 0.304          | 0.001 |
| Developmental phase                          | 4  | 100 | 3.21  | 0.059          | 0.001 |
| Microbe source                               | 1  | 100 | 3.24  | 0.015          | 0.008 |
| Soil type*Developmental phase                | 6  | 100 | 2.21  | 0.06           | 0.001 |
| Microbe source*Developmental phase           | 4  | 100 | 1.36  | 0.025          | 0.089 |
| Soil type*Microbe source                     | 1  | 100 | 3.04  | 0.014          | 0.011 |
| Soil type*Microbe source*Developmental phase | 4  | 100 | 1.58  | 0.029          | 0.031 |

669

670

Table 2 - Statistical results for aboveground plant metrics. Linear mixed-effects model was used to determine the impact of various predictors on plant height, leaf number, and dry biomass. The tray where plants were grown was used as a random variable.

671

| Predictor                                         | df | N    | Plant Height |         | Leaf Number |         | Dry Biomass |         |
|---------------------------------------------------|----|------|--------------|---------|-------------|---------|-------------|---------|
|                                                   |    |      | X2           | P       | X2          | P       | X2          | P       |
| Soil chemistry                                    | 3  | 3372 | 4890.83      | <0.0001 | 78.44       | <0.0001 | 60.40       | <0.0001 |
| Developmental phase                               | 3  | 3372 | 7012.10      | <0.0001 | 3064.16     | <0.0001 | 79.84       | <0.0001 |
| Microbe source                                    | 1  | 3372 | 2.58         | 0.108   | 137.12      | <0.0001 | 2.45        | 0.11784 |
| Soil chemistry*Developmental phase                | 9  | 3372 | 1294.27      | <0.0001 | 57.13       | <0.0001 | 35.69       | <0.0001 |
| Microbe source*Developmental phase                | 3  | 3372 | 40.84        | <0.0001 | 20.45       | 0.0001  | 8.81        | 0.03193 |
| Soil chemistry*Microbe source                     | 1  | 3372 | 296.64       | <0.0001 | 142.12      | <0.0001 | 2.34        | 0.12583 |
| Soil chemistry*Microbe source*Developmental phase | 3  | 3372 | 11.79        | 0.008   | 53.86       | <0.0001 | 6.72        | 0.08134 |

672

673

Table 3 - Statistical results for belowground plant metrics. Linear mixed-effects model was used to determine the impact of various predictors on root length, diameter, surface area, and volume. The tray where plants were grown was used as a random variable.

674

| Predictor                                         | df | N   | Root Length |         | Root Diameter |         | Root Surface Area |         | Root Volume |         |
|---------------------------------------------------|----|-----|-------------|---------|---------------|---------|-------------------|---------|-------------|---------|
|                                                   |    |     | X2          | P       | X2            | P       | X2                | P       | X2          | P       |
| Soil chemistry                                    | 3  | 242 | 197.34      | <0.0001 | 145.73        | <0.0001 | 154.25            | <0.0001 | 89.19       | <0.0001 |
| Developmental phase                               | 3  | 242 | 160.15      | <0.0001 | 0.24          | 0.971   | 140.32            | <0.0001 | 94.90       | <0.0001 |
| Microbe source                                    | 1  | 242 | 1.40        | 0.235   | 22.25         | <0.0001 | 1.66              | 0.198   | 1.86        | 0.173   |
| Soil chemistry*Developmental phase                | 3  | 242 | 79.24       | <0.0001 | 3.46          | 0.326   | 66.09             | <0.0001 | 42.79       | <0.0001 |
| Microbe source*Developmental phase                | 3  | 242 | 10.75       | 0.013   | 9.81          | 0.02    | 9.60              | 0.022   | 6.88        | 0.076   |
| Soil chemistry*Microbe source                     | 1  | 242 | 9.65        | 0.002   | 29.46         | <0.0001 | 8.62              | 0.003   | 5.97        | 0.015   |
| Soil chemistry*Microbe source*Developmental phase | 3  | 242 | 17.88       | 0.001   | 3.50          | 0.321   | 16.63             | 0.001   | 12.64       | 0.005   |

675

676

Table 4 - Cox proportional hazards model to determine differences in *Plantago erecta* phenology. Cox proportional hazards model was used to determine the likelihood of *P. erecta* reaching a particular plant development phase in distinct soil types. A HR=1 indicates the treatment was used as a reference to which other treatments were compared. A HR > 1 indicates an increased likelihood of development, while an HR < 1 indicates a decreased likelihood of development. For example, *P. erecta* grown in Serp+NSmic is 3.1 times more likely to reach the flowering phase than those grown in live serpentine soil (Serp). Values in parentheses are the confidence intervals for the hazard ratio and \* indicates p-value ≤ 0.001.

677

| Soil Type | Plant Developmental Phase |                     |                       |
|-----------|---------------------------|---------------------|-----------------------|
|           | Vegetative                | Early Flowering     | Late Flowering        |
| S+Sm      | 1                         | 1                   | 1                     |
| NS+NSm    | 1.38<br>(0.94-2.0)        | 1.7<br>(0.99-3.1)   | 1.3<br>(0.68-2.6)     |
| S+NSm     | 0.84<br>(0.56-1.2)        | 1.2<br>(0.65-2.1)   | 1<br>(0.52-2.1)       |
| NS+Sm     | 6.23*<br>(4.03-9.6)       | 4.2*<br>(2.36-7.6)  | 3.1*<br>(1.56-6.1)    |
| NS+Sm+Ni  | 7.45*<br>(4.02-13.8)      | 6.3*<br>(3.02-16.1) | 2.1<br>(0.99-4.5)     |
| NS+Sm+D   | 4.74*<br>(2.61-8.6)       | 9.9*<br>(4.78-20.3) | 30.9*<br>(11.52-83.0) |

678

679
